# Supplementary material for: Dual-responsive biocompatible microgels as high loaded cargo: understanding of encapsulation/release driving forces by NMR NOESY
Source: Royal Society of Chemistry journal article supplement (doi:10.1039/c7py02111a), 2018-01-01
Supplement: c7py02111a1.pdf [file c7py02111a1.pdf]

## Supplementary Information

### Dual-responsive biocompatible microgels as high loaded cargo: Understanding of encapsulation/release driving forces by NMR NOESY

Garbiñe Aguirre<sup>a,b</sup>, Abdeld Khoukh<sup>a</sup>, Kamel Chougrani<sup>c</sup>, Valérie Alard<sup>c</sup> and  
Laurent Billon<sup>a,b</sup>

<sup>a</sup> *Université de Pau & Pays Adour, CNRS, IPREM UMR 5254, 2 avenue du Président Angot, Pau F-64053, France*

<sup>b</sup> *Bio-inspired Materials Group : Functionality & Self-assembly, Université de Pau & Pays Adour, 2 avenue du Président Angot, Pau F-64053, France*

<sup>c</sup> *LVMH Recherche Parfums et Cosmétiques; 185 Av. de Verdun, St Jean de Braye F-45804, France*

\*Corresponding author: Email address: [laurent.billon@univ-pau.fr](mailto:laurent.billon@univ-pau.fr),  
telephone number: +33 559407609

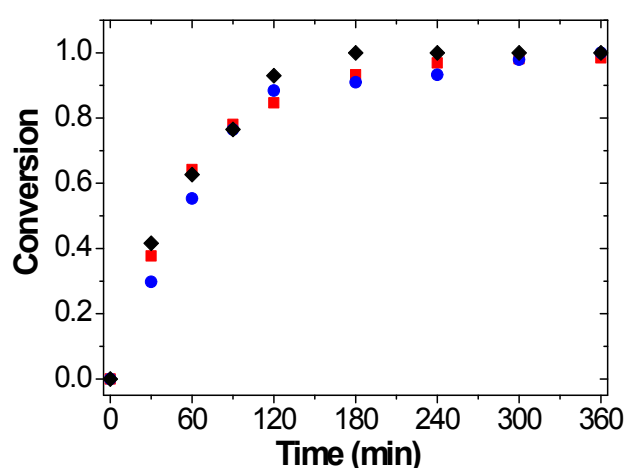

**Figure S1.** Evolutions of the partial conversions of ■ MeO<sub>2</sub>MA, ● MAA, and ◆ OEGDA.

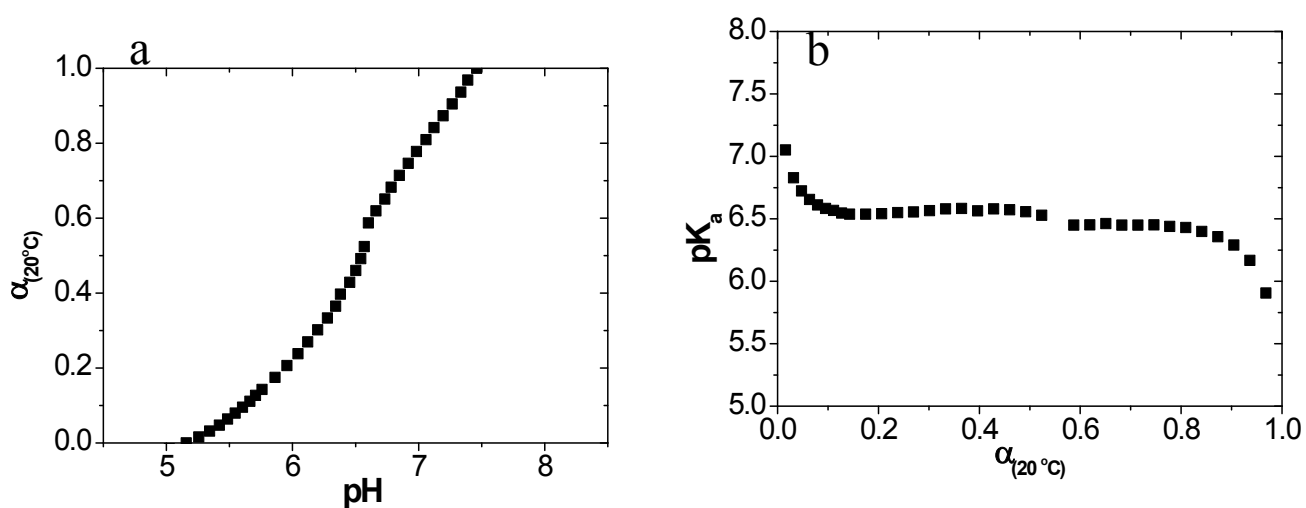

**Figure S2.** Degree of ionization ( $\alpha$ ) of MAA as a function of pH (a) and  $\text{pK}_a$  value for carboxylic acid group as a function of  $\alpha$  of the microgel particles.

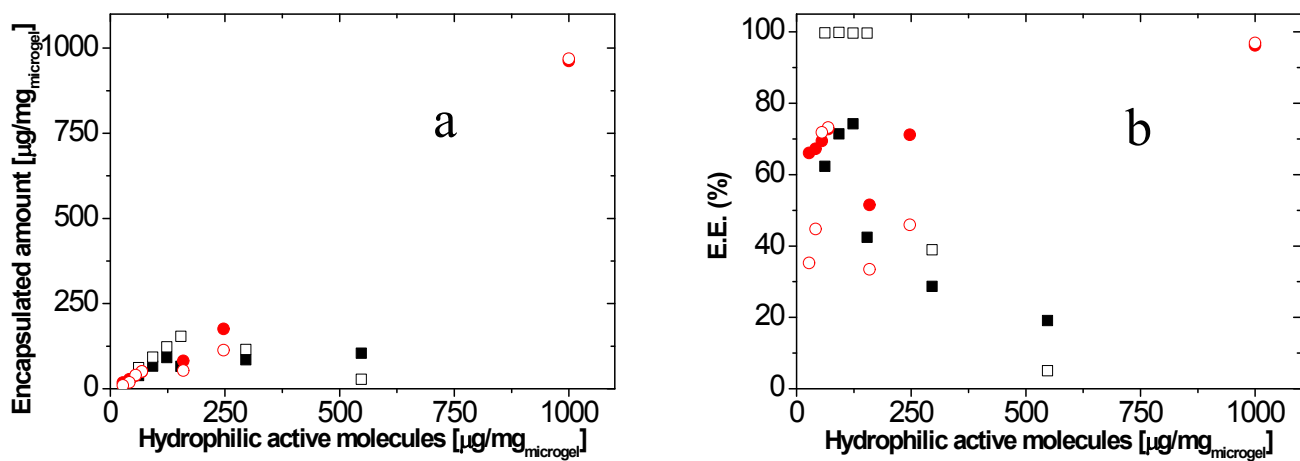

**Figure S3.** Encapsulated amounts (a) and entrapment efficiencies (E.E.) (b) as a function of hydrophilic active molecules concentration and pH for microgel particles using hydrophilic protocol. ■ Benzophenone-4 at pH 4.4; □ Benzophenone-4 at pH 7; ● Salicylic acid at pH 4.4; ○ Salicylic acid at pH 7.

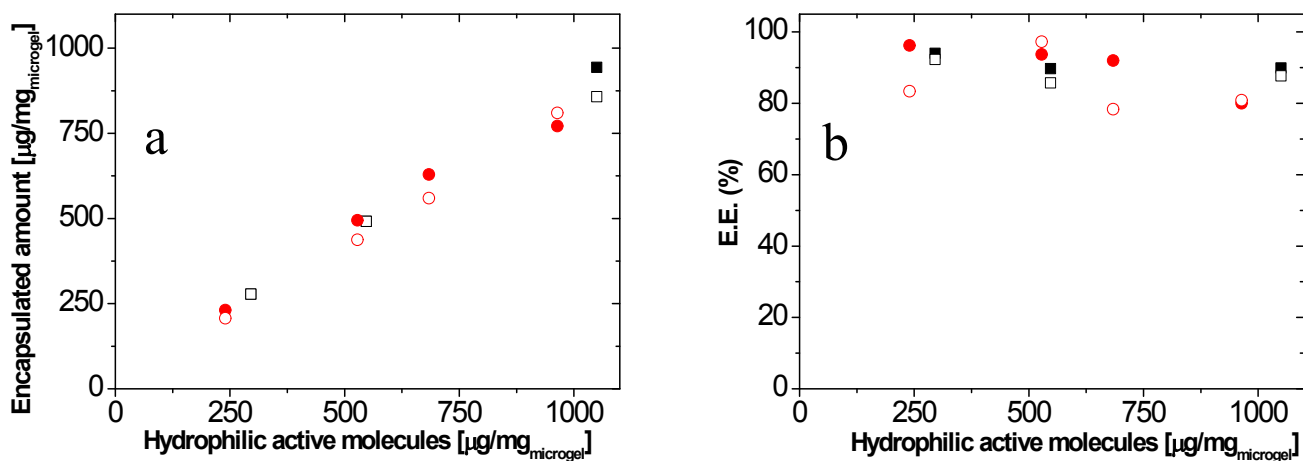

**Figure S4.** Encapsulated amounts and entrapment efficiencies (E.E.) as a function of hydrophilic active molecules concentration and temperature for microgel particles using hydrophobic protocol. ■ Benzophenone-4 at 20 °C; □ Benzophenone-4 at 50 °C; ● Salicylic acid at 20 °C; ○ Salicylic acid at 50 °C.

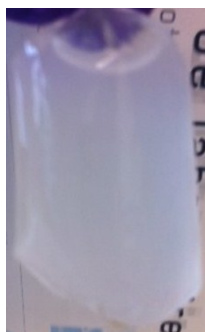

**Figure S5.** Escalol 587 precipitates/aggregates formation after dialyzing against deionized water for 48 h.

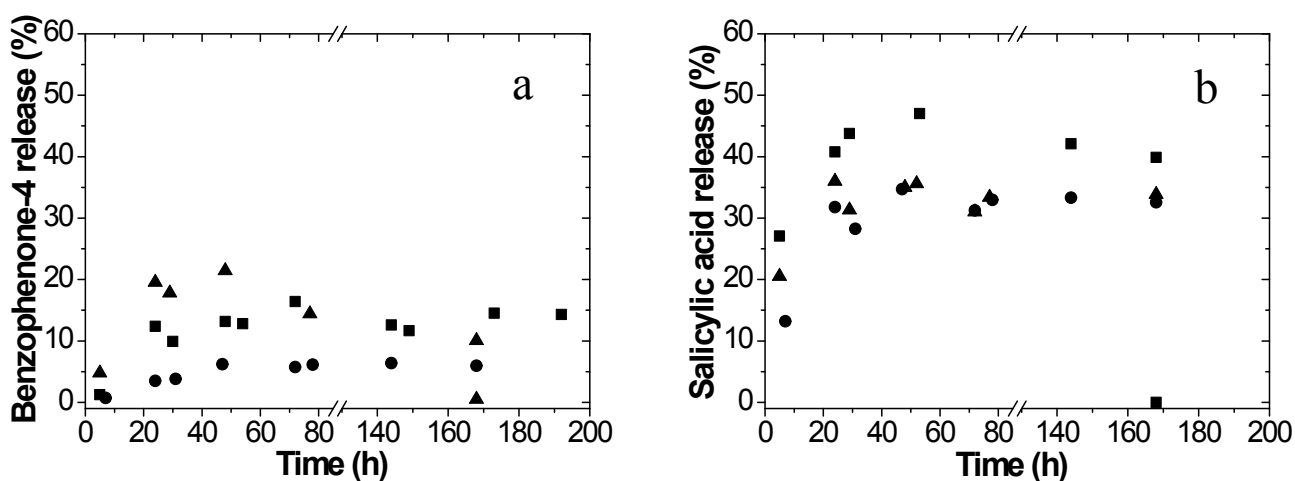

**Figure S6.** Benzophenone-4 (a) and Salicylic acid (b) release as a function of pH and temperature. ■ pH 4.5 and 25 °C; ● pH 6 and 25 °C; ▲ pH 4.5 and 37 °C.

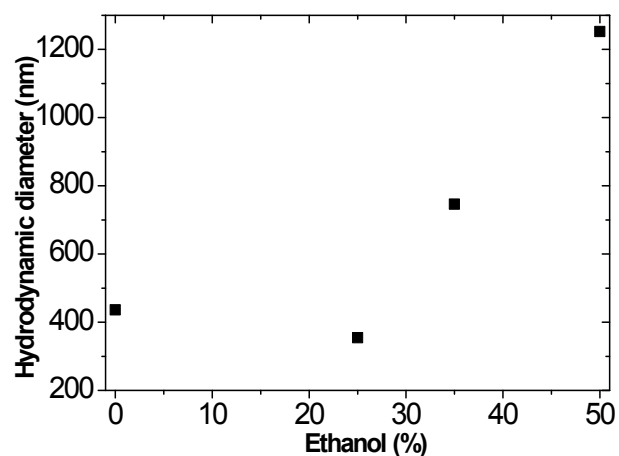

**Figure S7.** Average hydrodynamic diameters as a function of ethanol percentage.

**Table S1.** Fitting parameters for Peppas and Peppas model as a function of pH and temperature.

| Active molecule | pH 4.5 |      | pH 6  |      | 25 °C |      | 37 °C |      |
|-----------------|--------|------|-------|------|-------|------|-------|------|
|                 | k      | n    | k     | n    | k     | n    | k     | n    |
| Uvinul-A        | 0.035  | 0.13 | 0.040 | 0.38 | 0.034 | 0.13 | ---   | ---  |
| Escalol         | ---    | ---  | ---   | ---  | ---   | ---  | ---   | ---  |
| Benzophenone-4  | 0.012  | 0.34 | 0.029 | 0.30 | 0.041 | 0.24 | 0.068 | 0.23 |
| Salicylic acid  | 0.217  | 0.12 | 0.115 | 0.22 | 0.278 | 0.09 | 0.198 | 0.12 |

**Table S2.** Fitting parameters for Peppas and Peppas model as a function of medium hydrophobicity.

| Active molecule | 25 % of ethanol |      | 35 % of ethanol |      | 50 % of ethanol |      |
|-----------------|-----------------|------|-----------------|------|-----------------|------|
|                 | k               | n    | k               | n    | k               | n    |
| Uvinul-A        | 0.060           | 0.07 | 0.027           | 0.51 | 0.049           | 0.72 |
| Escalol         | 0.042           | 0.06 | 0.74            | 0.09 | 0.759           | 0.08 |
| Benzophenone-4  | 0.023           | 0.35 | 0.040           | 0.29 | 0.021           | 0.43 |
| Salicylic acid  | 0.432           | 0.19 | ---             | ---  | ---             | ---  |

**Table S3.** Fitting parameters for Peppas-Sahlin model as a function of medium pH.

| Fitting parameters | Uvinul-A |         | Benzophenone-4 |         | Salicylic acid |         |
|--------------------|----------|---------|----------------|---------|----------------|---------|
|                    | pH 4.5   | pH 6    | pH 4.5         | pH 6    | pH 4.5         | pH 6    |
| $k_1$              | 0.0130   | 0.0107  | 0.0154         | 0.0031  | 0.1931         | 0.0605  |
| $k_2$              | -0.0006  | -0.0011 | -0.0004        | -0.0001 | -0.0205        | -0.0027 |
| n                  | 0.54     | 0.81    | 0.58           | 0.80    | 0.37           | 0.51    |

**Table S4.** Fitting parameters for Peppas-Sahlin model as a function of medium temperature.

| Fitting parameters | Uvinul-A |       | Benzophenone-4 |         | Salicylic acid |         |
|--------------------|----------|-------|----------------|---------|----------------|---------|
|                    | 25 °C    | 37 °C | 25 °C          | 37 °C   | 25 °C          | 37 °C   |
| $k_1$              | 0.0129   | ---   | 0.0226         | 0.0194  | 0.1931         | 0.1583  |
| $k_2$              | -0.0006  | ---   | -0.0089        | -0.0004 | -0.0205        | -0.0183 |
| $n$                | 0.54     | ---   | 0.53           | 0.77    | 0.37           | 0.32    |

**Table S5.** Fitting parameters for Peppas-Sahlin model as a function of medium hydrophobicity for hydrophobic active molecules.

| Fitting parameters | Uvinul-A |        |         | Escalol |      |      |
|--------------------|----------|--------|---------|---------|------|------|
|                    | 25 %     | 35 %   | 50 %    | 25 %    | 35 % | 50 % |
| $k_1$              | 0.0685   | 0.0266 | 0.0689  | 0.0643  | ---  | ---  |
| $k_2$              | -0.0139  | 0.0024 | -0.0012 | -0.0178 | ---  | ---  |
| $n$                | 0.24     | 0.41   | 0.83    | 0.19    | ---  | ---  |

**Table S6.** Fitting parameters for Peppas-Sahlin model as a function of medium hydrophobicity for hydrophilic active molecules.

| Fitting parameters | Benzophenone-4 |         |        | Salicylic acid |      |      |
|--------------------|----------------|---------|--------|----------------|------|------|
|                    | 25 %           | 35 %    | 50 %   | 25 %           | 35 % | 50 % |
| $k_1$              | 0.0232         | 0.0209  | 0.0020 | 0.3470         | ---  | ---  |
| $k_2$              | -0.0001        | -0.0007 | 0.0024 | -0.0319        | ---  | ---  |
| $n$                | 0.35           | 0.56    | 0.35   | 0.38           | ---  | ---  |

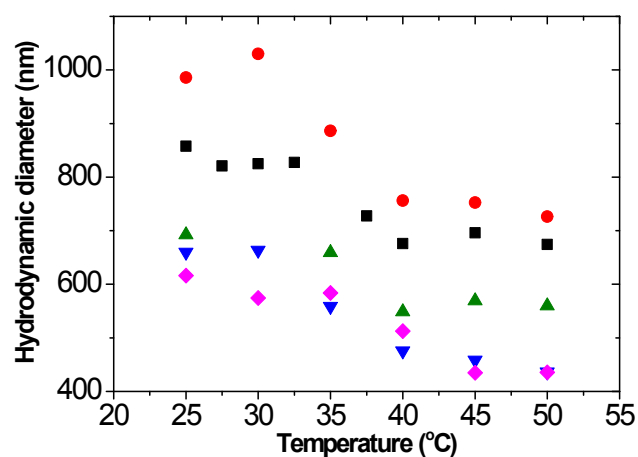

**Figure S8.** Average hydrodynamic diameters as a function of temperature at pH 6 and in buffered medium with an ionic strength of 1mM. ■Bare microgel particles, ●Uvinul-A loaded-microgel particles, ▲Escalol loaded-microgel particles, ▼Benzophenone-4 loaded-microgel particles, and ◆Salicylic acid loaded-microgel particles.

**Table S7.** VPTT values for bare and loaded-microgel particles.

| <b>Sample</b>                  | <b>VPTT (°C)</b> |
|--------------------------------|------------------|
| Bare microgel-particles        | 37.4             |
| Uvinul-A-loaded microgel       | 35.0             |
| Escalol 587-loaded microgel    | 35.1             |
| Benzophenone-4-loaded microgel | 39.9             |
| Salicylic acid-loaded microgel | 39.9             |
